# Supplementary material for: Three new cardiac glycosides obtained from the roots ofStreblus asperLour. and their cytotoxic and melanogenesis-inhibitory activities
Source: Royal Society of Chemistry journal article supplement (doi:10.1039/c8ra00733k), 2018-01-01
Supplement: c8ra00733k1.pdf [file c8ra00733k1.pdf]

**Three new cardiac glycosides from the roots of *Streblus asper* Lour. and their  
cytotoxic and melanogenesis-inhibitory activities**

Dan Miao,<sup>a</sup> Tengqian Zhang,<sup>a</sup> Jian Xu,<sup>a</sup> Congyu Ma,<sup>d</sup> Wenyuan Liu,<sup>d</sup> Takashi Kikuchi,<sup>e</sup>

Toshihiro Akihisa,<sup>f</sup> Masahiko Abe,<sup>f</sup> Feng Feng<sup>\*abc</sup> and Jie Zhang<sup>\*ab</sup>

<sup>a</sup> *School of Traditional Chinese Pharmacy, China Pharmaceutical University, Nanjing  
211198, P. R. China*

<sup>b</sup> *Key Laboratory of Biomedical Functional Materials, China Pharmaceutical  
University, Nanjing 211198, P. R. China*

<sup>c</sup> *Jiangsu Food and Pharmaceutical Science College, Huaian, Jiangsu, 223003, China*

<sup>d</sup> *Department of Pharmaceutical Analysis, China Pharmaceutical University, Nanjing  
210009, China*

<sup>e</sup> *Osaka University of Pharmaceutical Sciences, 4-20-1 Nasahara, Takatsuki, Osaka  
569-1094, Japan*

<sup>f</sup> *Research Institute for Science and Technology, Tokyo University of Science, 2641*

*Yamazaki, Noda, Chiba 278-8510, Japan*

S1. <sup>1</sup>H-NMR spectrum of compound **1**

S2. <sup>13</sup>C-NMR spectrum of compound **1**

S3. HSQC spectrum of compound **1**

S4. HMBC spectrum of compound **1**

S5. <sup>1</sup>H-<sup>1</sup>H COSY spectrum of compound **1**

S6. ROESY spectrum of compound **1**

S7. <sup>1</sup>H-NMR spectrum of compound **2**

S8. <sup>13</sup>C-NMR spectrum of compound **2**

S9. HSQC spectrum of compound **2**

S10. HMBC spectrum of compound **2**

S11. <sup>1</sup>H-<sup>1</sup>H COSY spectrum of compound **2**

S12. ROESY spectrum of compound **2**

S13 <sup>1</sup>H-NMR spectrum of compound **3**

S14. <sup>13</sup>C-NMR spectrum of compound **3**

S15. HSQC spectrum of compound **3**

S16. HMBC spectrum of compound **3**

S17.  $^1\text{H}$ - $^1\text{H}$  COSY spectrum of compound **3**

S18. ROESY spectrum of compound **3**

S19. List of all compounds

S20.  $^1\text{H}$ -NMR and  $^{13}\text{C}$ -NMR spectroscopic data of compounds **1** and reference ( $\delta$  in ppm,  $J$  in Hz)

S21.  $^1\text{H}$ -NMR and  $^{13}\text{C}$ -NMR spectroscopic data of compounds **2** and reference ( $\delta$  in ppm,  $J$  in Hz)

S22.  $^1\text{H}$ -NMR and  $^{13}\text{C}$ -NMR spectroscopic data of compounds **3** and reference ( $\delta$  in ppm,  $J$  in Hz)

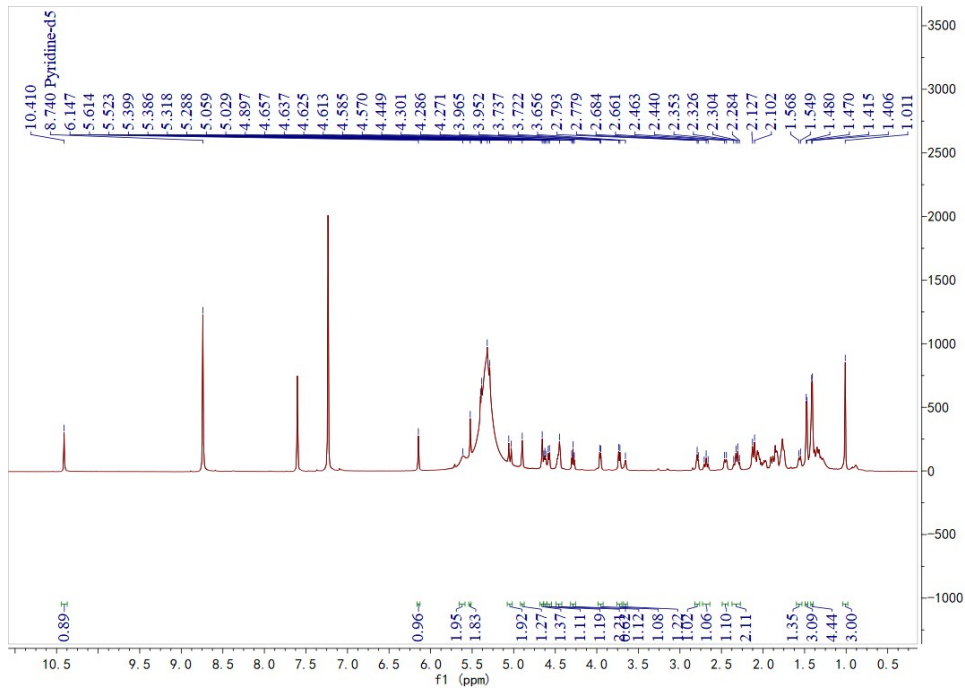

S1. <sup>1</sup>H-NMR spectrum of compound **1**

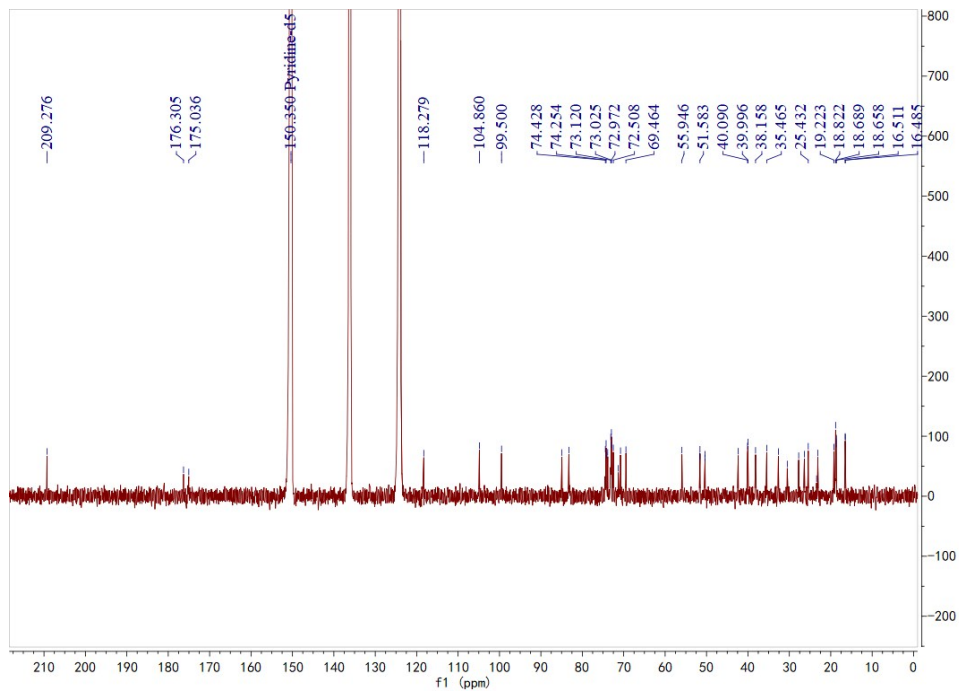

S2. <sup>13</sup>C-NMR spectrum of compound **1**

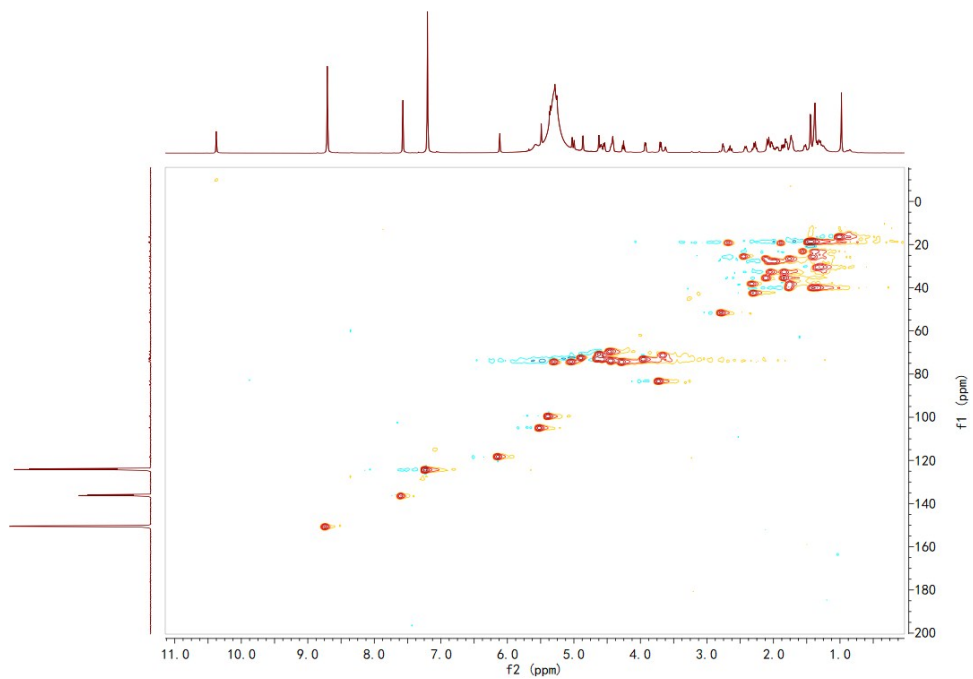

S3. HSQC spectrum of compound 1

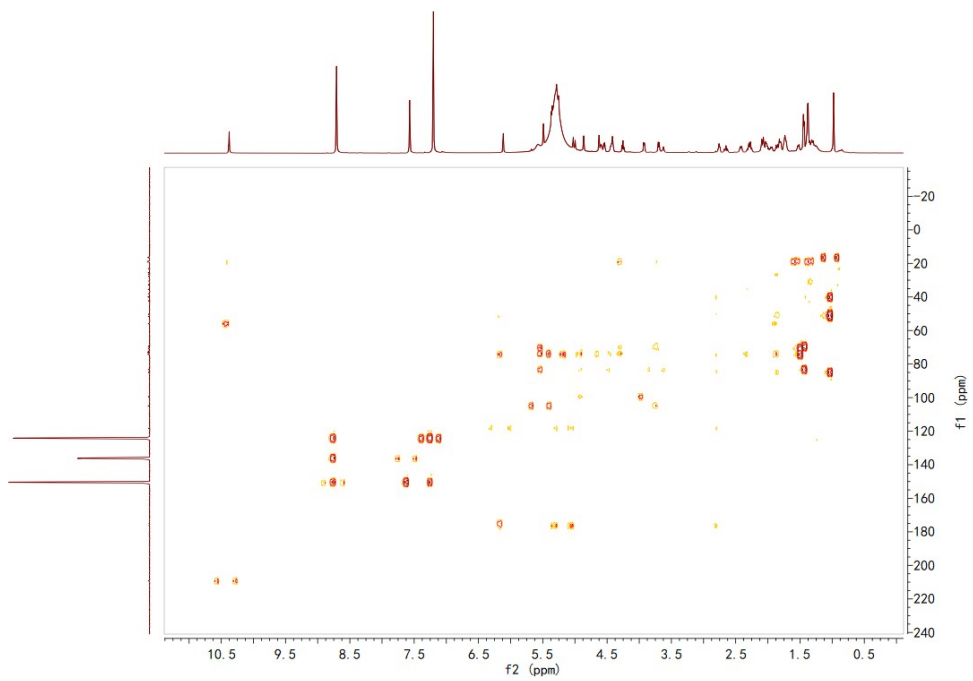

S4. HMBC spectrum of compound 1

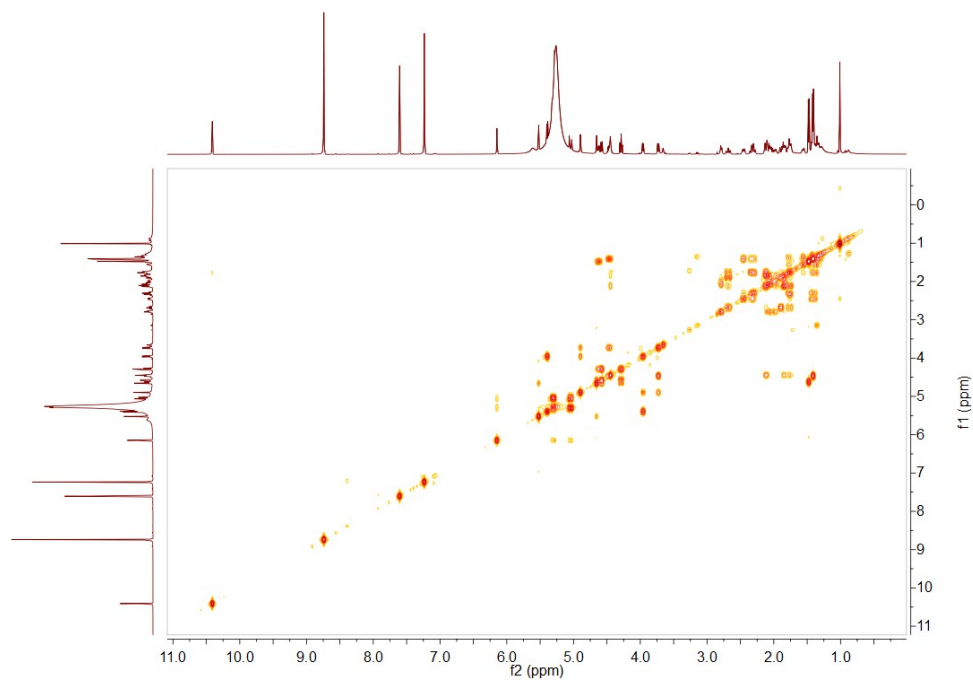

S5. <sup>1</sup>H-<sup>1</sup>H COSY spectrum of compound **1**

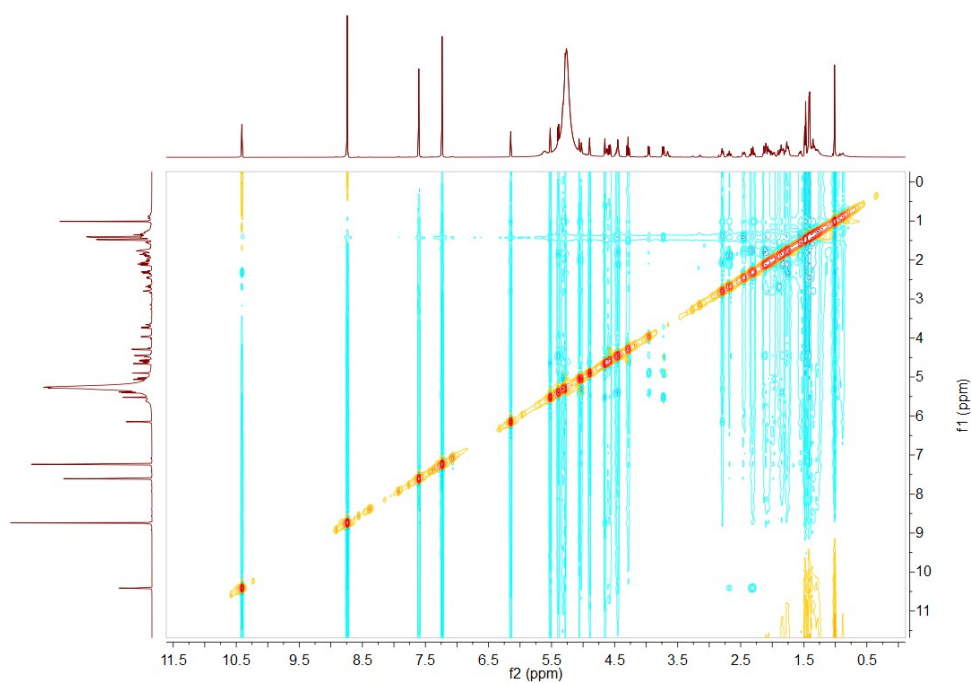

S6. ROESY spectrum of compound **1**

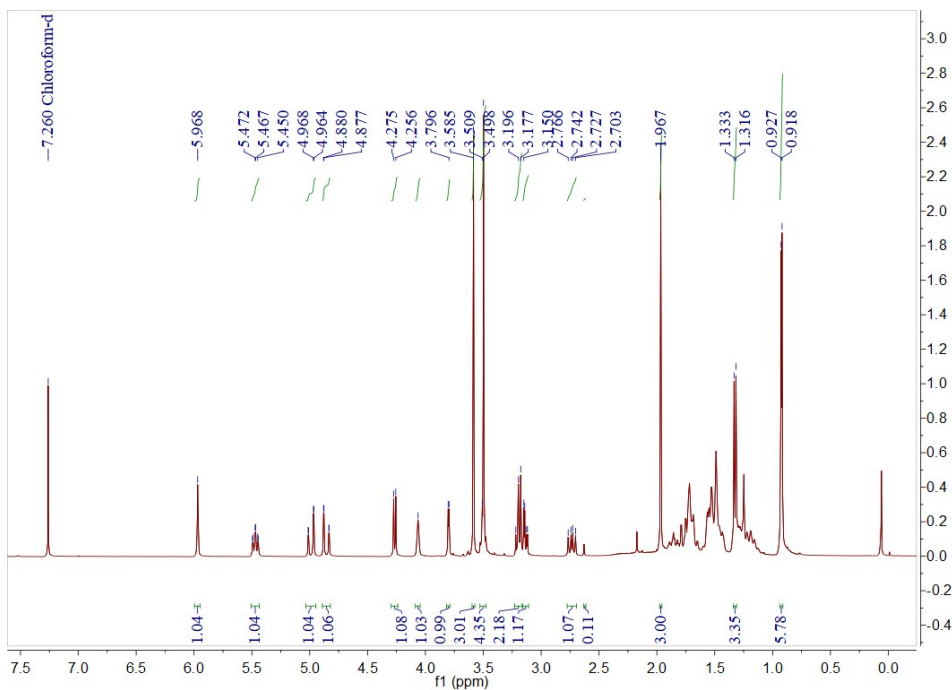

S7. <sup>1</sup>H-NMR spectrum of compound 2

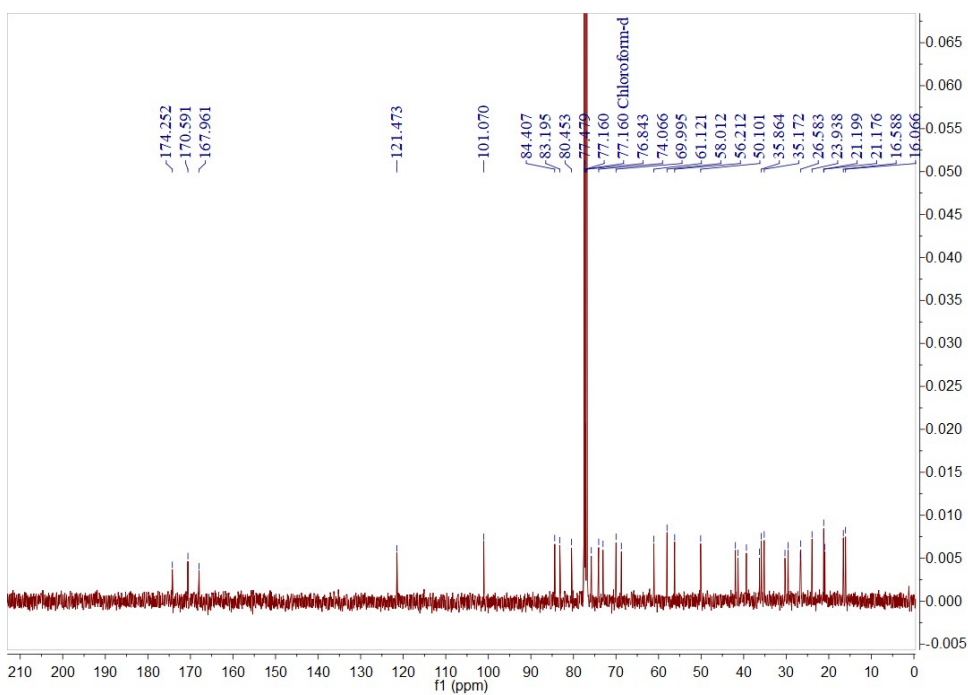

S8. <sup>13</sup>C-NMR spectrum of compound 2

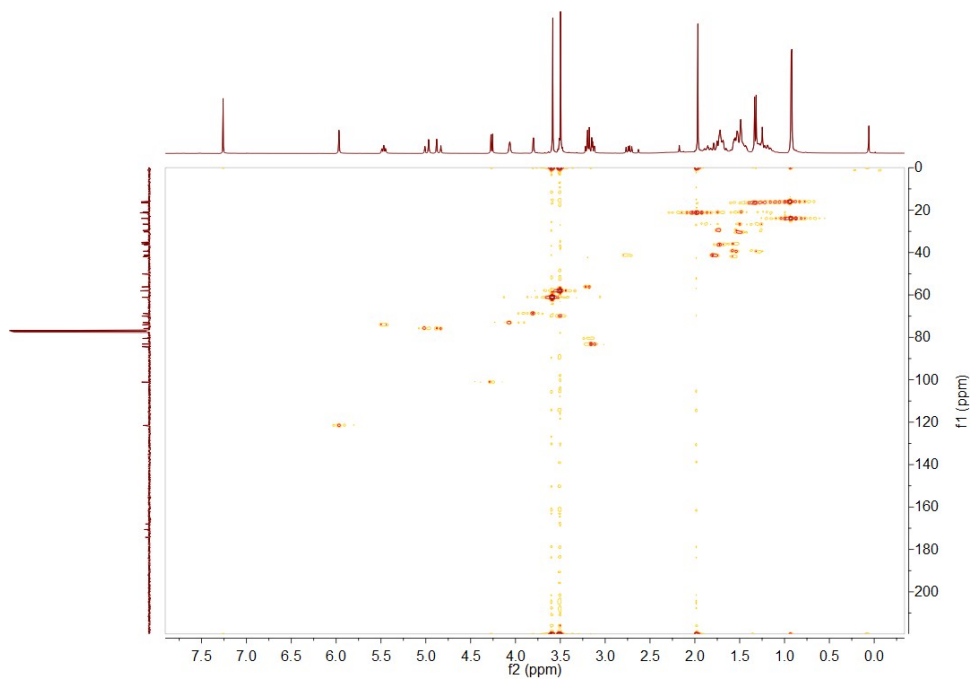

S9. HSQC spectrum of compound **2**

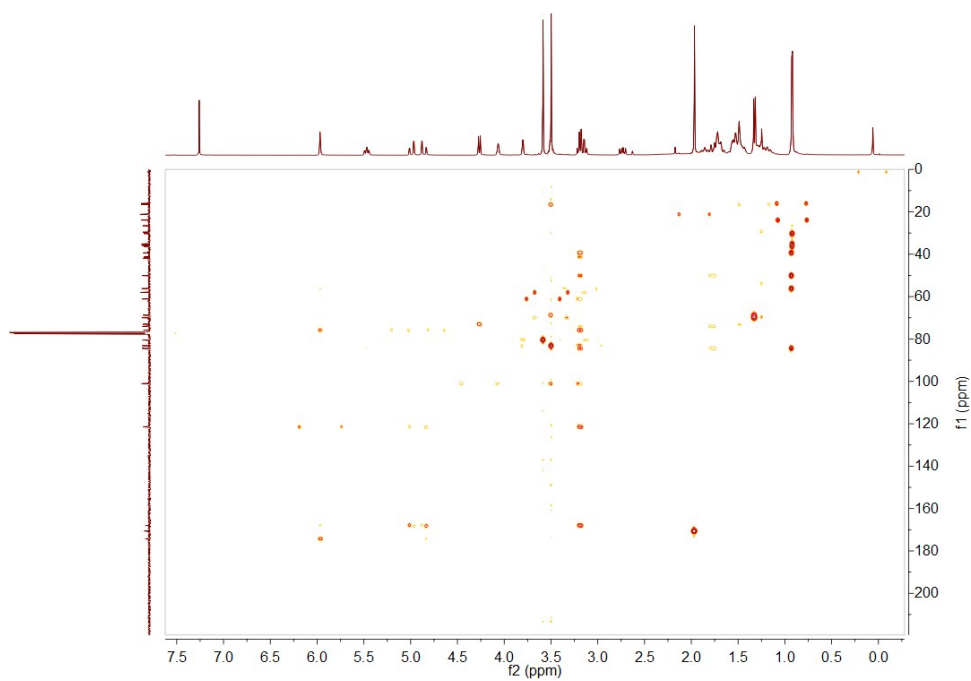

S10. HMBC spectrum of compound **2**



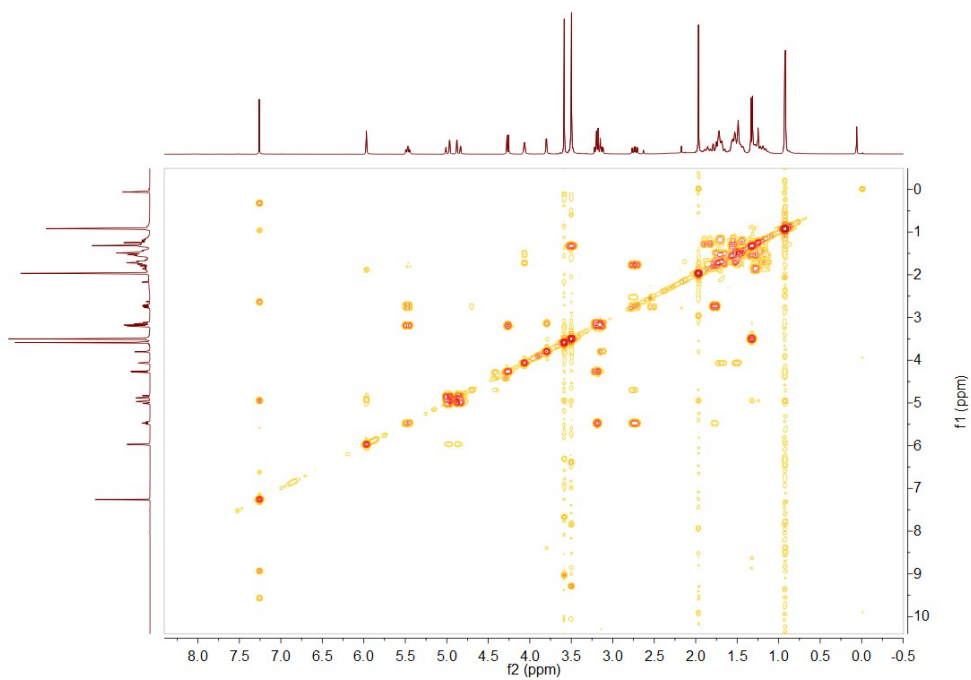

S11.  $^1\text{H}$ - $^1\text{H}$  COSY spectrum of compound **2**

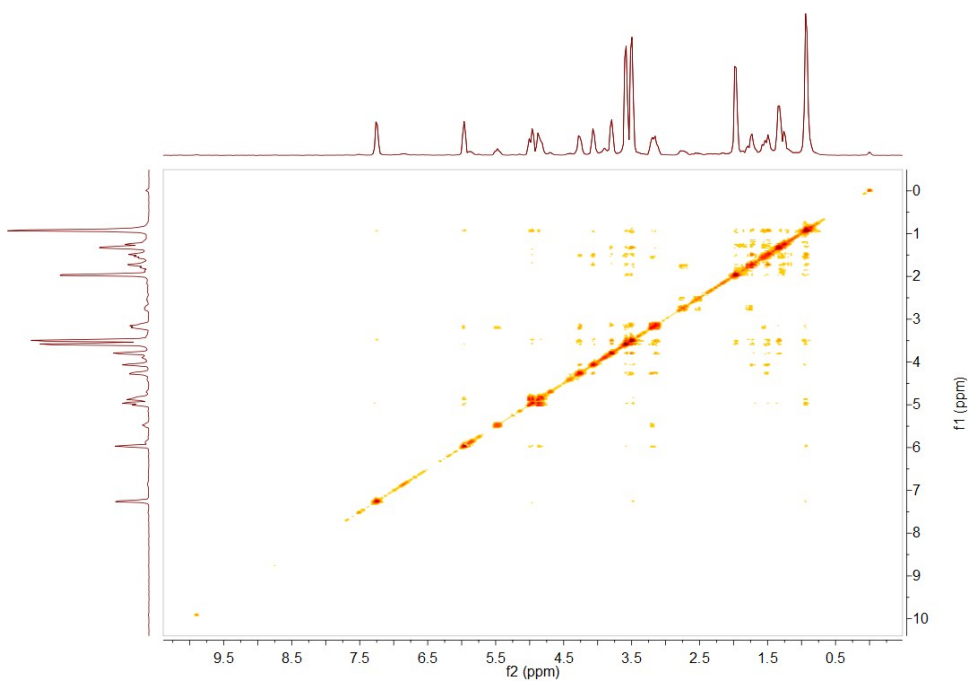

S12. NOESY spectrum of compound **2**

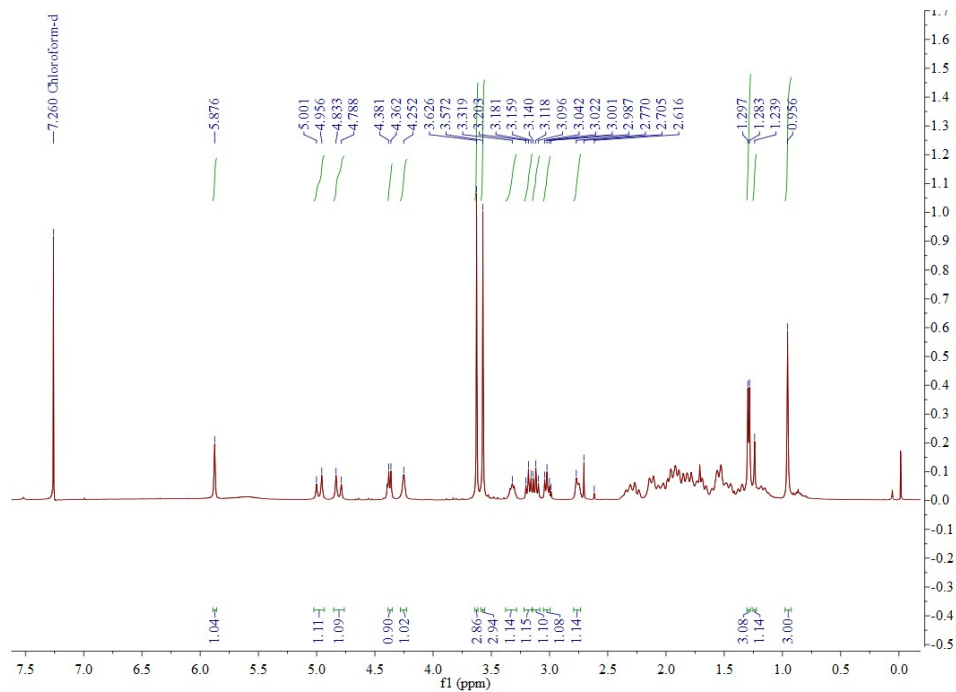

S13.  $^1\text{H}$ -NMR spectrum of compound **3**

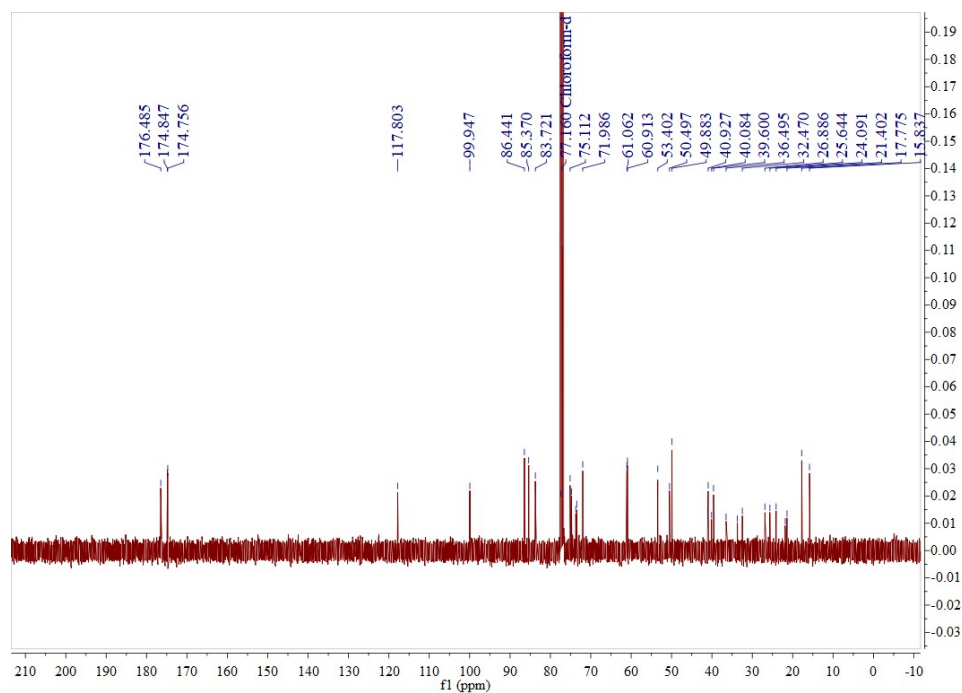

S14.  $^{13}\text{C}$ -NMR spectrum of compound **3**

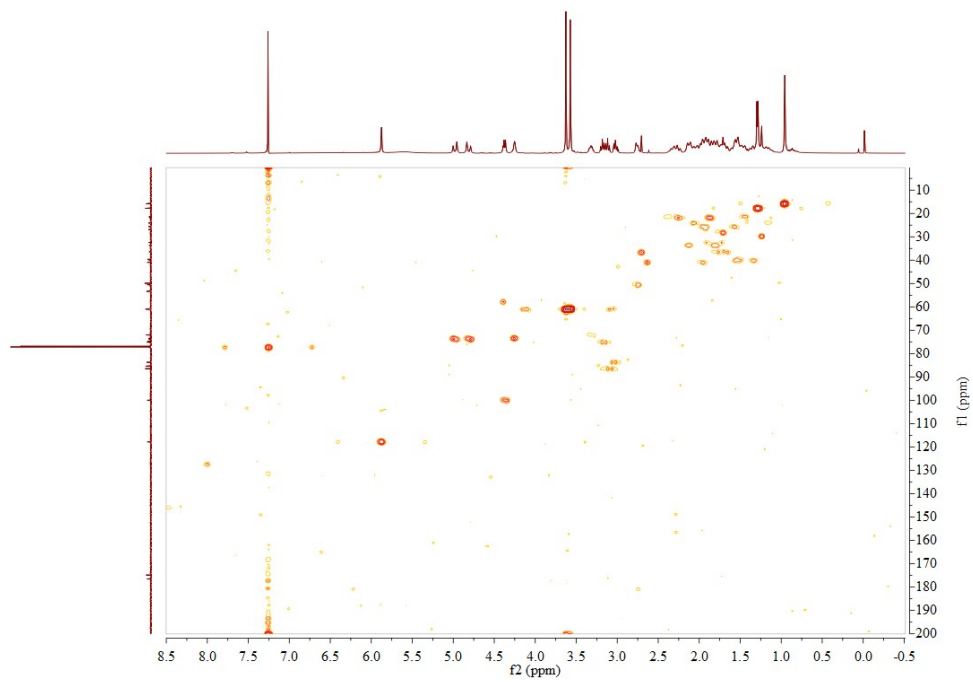

S15. HSQC spectrum of compound **3**

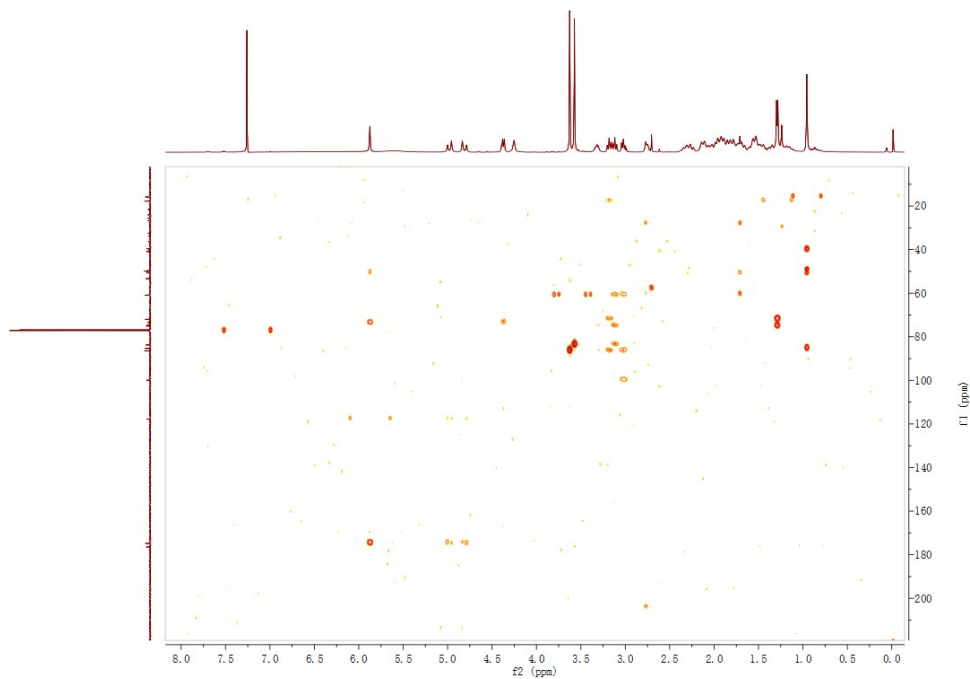

S16. HMBC spectrum of compound **3**

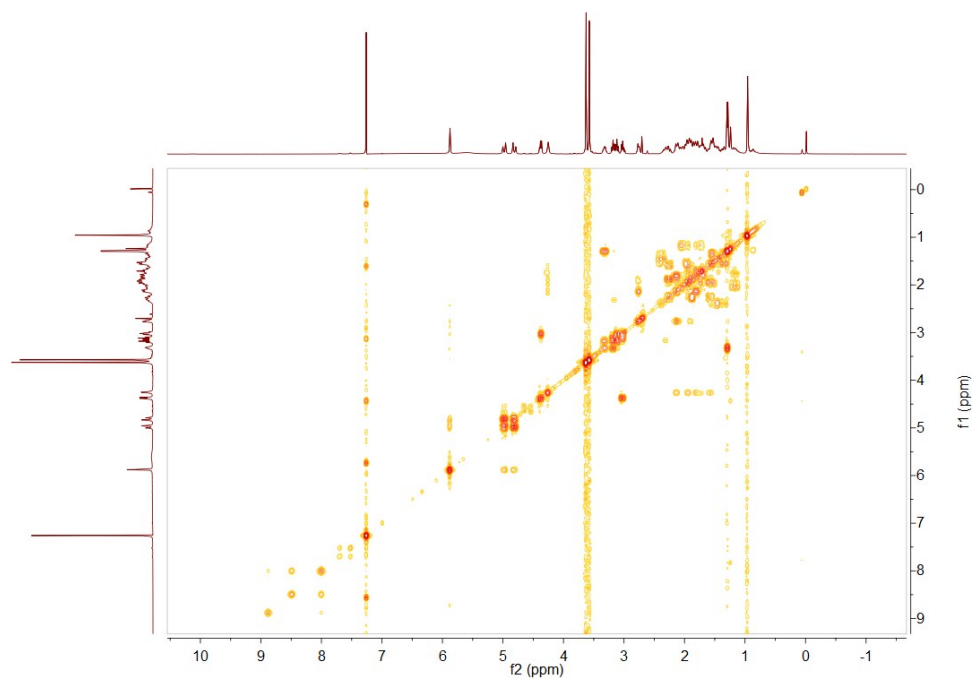

S17.  $^1\text{H}$ - $^1\text{H}$  COSY spectrum of compound **3**

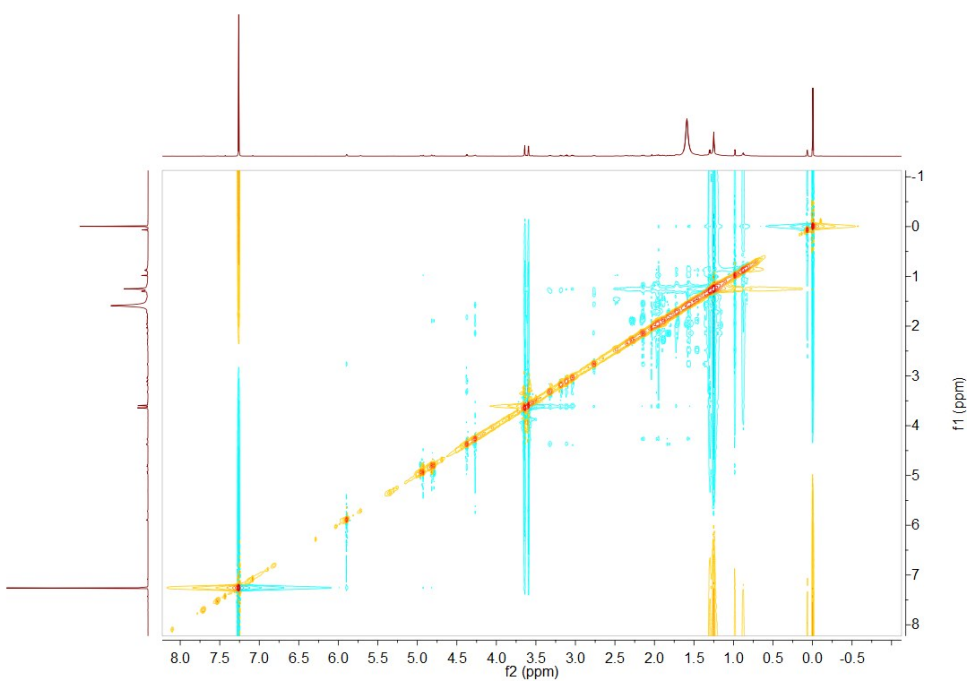

S18. ROESY spectrum of compound **3**

S19. List of all compounds

| No. | Name                                                                                                            | Structure                                                                            |
|-----|-----------------------------------------------------------------------------------------------------------------|--------------------------------------------------------------------------------------|
| 1   | Strophanthidin-3- <i>O</i> - $\alpha$ -L-rhamnopyranosyl-(1 $\rightarrow$ 4)-6-deoxy- $\beta$ -D-allopyranoside | 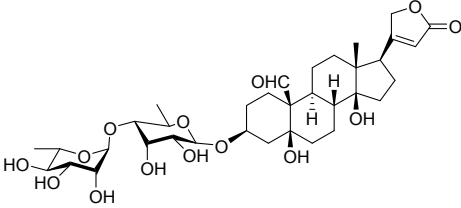   |
| 2   | 5 $\beta$ H-16 $\beta$ -acetylkamaloside                                                                        |    |
| 3   | Mansonin-19-carboxylic acid                                                                                     |   |
| 4   | Mansonin                                                                                                        |  |
| 5   | Strebloside                                                                                                     |  |
| 6   | Glucostrebloside                                                                                                |  |



S20. <sup>1</sup>H-NMR and <sup>13</sup>C-NMR spectroscopic data of compounds **1** and reference ( $\delta$  in ppm,  $J$  in Hz)

| Position | <b>1<sup>a</sup></b> |                                  | HMBC<br>(H→C) | Reference: Strophanthidin-<br>3- <i>O</i> - $\beta$ -D-<br>glucopyranosyl-(1→6)- <i>O</i> - $\beta$ -D-glucopyranosyl-<br>(1→4)- <i>O</i> - $\beta$ -D-diginopyranosyl-(1→4)- <i>O</i> - $\beta$ -D-<br>oleandropyranosyl-(1→4)- <i>O</i> - $\beta$ -D-<br>digitoxopyranosyl-(1→4)- $\beta$ -D-<br>digitoxopyranoside <sup>b,1</sup> |                                        |
|----------|----------------------|----------------------------------|---------------|--------------------------------------------------------------------------------------------------------------------------------------------------------------------------------------------------------------------------------------------------------------------------------------------------------------------------------------|----------------------------------------|
|          | $\delta_C$           | $\delta_H$                       |               | $\delta_C$                                                                                                                                                                                                                                                                                                                           | $\delta_H$                             |
| 1        | 19.2                 | 1.89, m<br>2.68, dd (13.8, 13.8) | 10            | 18.5                                                                                                                                                                                                                                                                                                                                 | 1.89, m<br>2.57, ddd (14.6, 14.6, 3.2) |
| 2        | 25.4                 | 1.41, m<br>2.45, d (13.8)        |               | 25.6                                                                                                                                                                                                                                                                                                                                 | 1.66, m<br>2.18, dd (14.1, 2.6)        |
| 3        | 73.9                 | 4.44, m                          |               | 74.9                                                                                                                                                                                                                                                                                                                                 | 4.33, br s                             |
| 4        | 35.5                 | 1.84, m<br>2.12, m               | 5             | 36.2                                                                                                                                                                                                                                                                                                                                 | 1.70, m<br>2.17,                       |
| 5        | 74.1                 |                                  |               | 74.0                                                                                                                                                                                                                                                                                                                                 |                                        |
| 6        | 42.4                 | 1.55, m<br>2.29, d (12.0)        | 4, 5          | 36.9                                                                                                                                                                                                                                                                                                                                 | 1.77, m<br>2.29, m                     |
| 7        | 23.1                 | 1.37, m<br>1.56, d (5.4)         | 5             | 24.8                                                                                                                                                                                                                                                                                                                                 | 1.42, m<br>2.45, m                     |
| 8        | 40.1                 | 1.41, m                          | 6             | 41.9                                                                                                                                                                                                                                                                                                                                 | 2.28, m                                |
| 9        | 40.0                 | 1.77, m                          | 10, 11, 13    | 39.5                                                                                                                                                                                                                                                                                                                                 | 1.75, m                                |
| 10       | 56.0                 |                                  |               | 55.3                                                                                                                                                                                                                                                                                                                                 |                                        |
| 11       | 26.4                 | 1.76, m<br>2.11, m               | 13            | 22.6                                                                                                                                                                                                                                                                                                                                 | 1.37, m<br>1.56, m                     |
| 12       | 38.2                 | 1.76, m<br>2.34, d (16.2)        |               | 39.5                                                                                                                                                                                                                                                                                                                                 | 1.34, m<br>1.41, m                     |
| 13       | 50.4                 |                                  |               | 49.8                                                                                                                                                                                                                                                                                                                                 |                                        |
| 14       | 84.9                 |                                  |               | 84.4                                                                                                                                                                                                                                                                                                                                 |                                        |
| 15       | 32.7                 | 1.84, m<br>2.05, m               | 13, 14        | 32.1                                                                                                                                                                                                                                                                                                                                 | 1.83, m<br>2.06, m                     |
| 16       | 27.7                 | 1.99, m<br>2.07, m               |               | 27.2                                                                                                                                                                                                                                                                                                                                 |                                        |

|     |                                       |                          |                                                   |
|-----|---------------------------------------|--------------------------|---------------------------------------------------|
| 17  | 51.6 2.79, m                          | 8, 13, 14,<br>20, 21, 22 | 51.1 2.78, br d (8.7)                             |
| 18  | 16.5 1.01, s                          | 8, 13, 14                | 16.0 1.00, s                                      |
| 19  | 209.3 10.41, s                        | 1, 10                    | 208.5 10.40, s                                    |
| 20  | 176.3                                 |                          | 175.7                                             |
| 21  | 74.3 5.04, d (18.0)<br>5.30, d (18.0) | 20, 22                   | 73.7 5.03, dd (18.0, 1.3)<br>5.29, dd (18.0, 1.3) |
| 22  | 118.3 6.15, s                         | 17, 20, 21               | 117.8 6.13, br s                                  |
| 23  | 175.0                                 |                          | 174.5                                             |
| 1'  | 99.5 5.39, d (7.8)                    | 3                        | 100.8                                             |
| 2'  | 74.2 3.96, d (7.8)                    | 1'                       | 72.4                                              |
| 3'  | 72.5 4.90, s                          | 1', 4'                   | 72.9                                              |
| 4'  | 83.2 3.73, d (9.0)                    | 5'                       | 83.9                                              |
| 5'  | 69.5 4.46, m                          | 6'                       | 69.2                                              |
| 6'  | 18.8 1.41, d (5.4)                    |                          | 18.6                                              |
| 1'' | 104.9 5.52, s                         | 4', 2'', 5''             | 104.0                                             |
| 2'' | 73.0 4.66, s                          | 3''                      | 72.4                                              |
| 3'' | 74.4 4.29, dd (9.0, 9.0)              | 4'', 5''                 | 72.2                                              |
| 4'' | 73.1 4.58, d (9.0)                    | 6''                      | 73.7                                              |
| 5'' | 70.8 4.63, m                          |                          | 70.3                                              |
| 6'' | 18.7 1.48, d (6.0)                    | 3''                      | 18.4                                              |

<sup>a</sup> <sup>1</sup>H (600 MHz) and <sup>13</sup>C (150 MHz) NMR spectroscopic data in pyridine-*d*<sub>5</sub>.

<sup>b</sup> <sup>1</sup>H (500 MHz) and <sup>13</sup>C (125 MHz) NMR spectroscopic data in pyridine-*d*<sub>5</sub>.



S21. <sup>1</sup>H-NMR and <sup>13</sup>C-NMR spectroscopic data of compounds **2** and reference ( $\delta$  in ppm,  $J$  in Hz)

| Position | <b>2<sup>a</sup></b> |                                              | HMBC<br>(H→C)               | Reference:                   | Reference:                                    | $\delta_{\text{H}}$               |
|----------|----------------------|----------------------------------------------|-----------------------------|------------------------------|-----------------------------------------------|-----------------------------------|
|          | $\delta_{\text{C}}$  | $\delta_{\text{H}}$                          |                             | oleandrigenin <sup>b,2</sup> | acoschimperoside P, 2'-acetate <sup>c,3</sup> |                                   |
| 1        | 30.3                 | 1.44, m<br>1.51, m                           |                             | 29.5                         | 30.8                                          | 1.53, m<br>1.57, m                |
| 2        | 26.7                 | 1.26, m<br>1.50, m                           |                             | 27.8                         | 26.5                                          | 1.20, m<br>1.56, m                |
| 3        | 73.1                 | 4.06, br s                                   |                             | 66.6                         | 73.3                                          | 4.15, br s                        |
| 4        | 29.6                 | 1.26, m<br>1.73, m                           |                             | 33.2                         | 30.1                                          | 1.74, m<br>1.98, m                |
| 5        | 36.3                 | 1.72, m                                      |                             | 35.8                         | 35.6                                          | 1.51, m                           |
| 6        | 26.6                 | 1.25, m<br>1.88, m                           |                             | 26.2                         | 24.0                                          | 1.32, m<br>1.43, m                |
| 7        | 21.2                 | 1.69, m<br>1.74, m                           |                             | 20.8                         | 21.4                                          | 1.30, m<br>1.66, m                |
| 8        | 41.9                 | 1.57, m                                      |                             | 41.7                         | 42.0                                          | 1.78, m                           |
| 9        | 35.9                 | 1.58, m                                      |                             | 35.4                         | 37.1                                          | 1.81, m                           |
| 10       | 35.2                 |                                              |                             | 35.2                         | 35.1                                          |                                   |
| 11       | 20.9                 | 1.20, m<br>1.48, m                           |                             | 21.0                         | 21.0                                          | 1.30, m<br>1.66, m                |
| 12       | 39.4                 | 1.32, m<br>1.54, m                           |                             | 41.2                         | 38.7                                          | 1.32, m<br>1.43, m                |
| 13       | 50.1                 |                                              |                             | 49.9                         | 50.4                                          |                                   |
| 14       | 84.4                 |                                              |                             | 84.1                         | 83.2                                          |                                   |
| 15       | 41.3                 | 1.77, dd (15.6, 2.4)<br>2.73, dd (15.6, 9.6) | 13                          | 39.2                         | 41.2                                          | 2.12, br s<br>2.78, dd (9.7, 5.5) |
| 16       | 74.1                 | 5.47, td (9.2, 2.4)                          | 16-OCOCH <sub>3</sub><br>20 | 73.8                         | 74.8                                          | 5.68, dd (9.7, 8.9)               |
| 17       | 56.2                 | 3.20, m                                      | 13, 20, 21                  | 56.0                         | 56.7                                          | 3.38, d (8.9)                     |
| 18       | 16.1                 | 0.93, s                                      | 12, 13, 14                  | 15.9                         | 16.3                                          | 1.07, s                           |

|                       |       |                      |            |       |       |                      |
|-----------------------|-------|----------------------|------------|-------|-------|----------------------|
| 19                    | 23.9  | 0.92, s              | 1, 5       | 23.6  | 23.8  | 0.85, s              |
| 20                    | 168.0 |                      |            | 170.1 | 170.5 |                      |
| 21                    | 75.8  | 4.85, dd (18.4, 1.6) | 20         | 75.6  | 76.4  | 5.41, dd (18.1, 1.7) |
|                       |       | 4.97, dd (18.4, 1.6) |            |       |       | 5.54, dd (18.1, 1.7) |
| 22                    | 121.5 | 5.96, s              | 20         | 121.2 | 121.6 | 6.35, s              |
| 23                    | 174.3 |                      | 21         | 173.8 | 174.5 |                      |
| 16-OCOCH <sub>3</sub> | 21.2  | 1.97, s              |            | 21.0  | 21.6  | 2.04, s              |
|                       | 170.6 |                      |            | 167.5 | 170.5 |                      |
| 1'                    | 101.1 | 4.27, d (7.6)        | 3          |       |       |                      |
| 2'                    | 80.5  | 3.19, d (7.6)        | 1', 3'     |       |       |                      |
| 3'                    | 83.2  | 3.13, dd (9.6, 3.2)  | 4'         |       |       |                      |
| 4'                    | 68.7  | 3.80, d (3.2)        |            |       |       |                      |
| 5'                    | 70.0  | 3.50, m              | 1', 4', 6' |       |       |                      |
| 6'                    | 16.6  | 1.33, d (6.8)        | 5'         |       |       |                      |
| 2'-OCH <sub>3</sub>   | 61.1  | 3.59, s              | 1', 2'     |       |       |                      |
| 3'-OCH <sub>3</sub>   | 58.0  | 3.50, s              | 3'         |       |       |                      |

---

<sup>a</sup> <sup>1</sup>H (400 MHz) and <sup>13</sup>C (100 MHz) NMR spectroscopic data in chloroform-*d*.

<sup>b</sup> <sup>13</sup>C (100 MHz) NMR spectroscopic data in chloroform-*d*.

<sup>c</sup> <sup>1</sup>H (400 MHz) and <sup>13</sup>C (100 MHz) NMR spectroscopic data in pyridine-*d*<sub>5</sub>.

S22. <sup>1</sup>H-NMR and <sup>13</sup>C-NMR spectroscopic data of compounds **3** and reference ( $\delta$  in ppm,  $J$  in Hz)

| Position | <b>3<sup>a</sup></b> |                    | HMBC<br>(H→C) | <b>Reference: reevesioside D<sup>b,4</sup></b> |                     |
|----------|----------------------|--------------------|---------------|------------------------------------------------|---------------------|
|          | $\delta_C$           | $\delta_H$         |               | $\delta_C$                                     | $\delta_H$          |
| 1        | 21.4                 | 1.44, m<br>2.39, m | 19            | 21.3                                           | 1.46, m<br>2.36, m  |
| 2        | 25.6                 | 1.57, m<br>1.93, m |               | 25.7                                           | 1.59, m<br>1.94, m  |
| 3        | 73.5                 | 4.25, br s         |               | 72.2                                           | 4.25, br s          |
| 4        | 33.7                 | 1.81, m<br>2.12, m |               | 33.2                                           | 1.79, m<br>2.08, m  |
| 5        | 75.1                 |                    |               | 74.6                                           |                     |
| 6        | 36.5                 | 1.65, m<br>1.76, m |               | 36.5                                           | 1.72, m<br>2.07, m  |
| 7        | 24.1                 | 1.17, m<br>2.07, m |               | 23.9                                           | 1.25, m<br>2.09, m  |
| 8        | 40.9                 | 1.24, m            |               | 40.7                                           | 1.52, m             |
| 9        | 40.1                 | 1.96, m            |               | 39.4                                           | 1.92, m             |
| 10       | 53.4                 |                    |               | 53.3                                           |                     |
| 11       | 21.9                 | 1.86, m<br>2.25, m |               | 21.8                                           | 1.31, m<br>1.54, m  |
| 12       | 39.6                 | 1.34, m<br>1.56, m |               | 40.0                                           | 1.33, m<br>1.52, m  |
| 13       | 49.9                 |                    |               | 49.8                                           |                     |
| 14       | 85.4                 |                    |               | 85.3                                           |                     |
| 15       | 32.5                 | 1.73, m<br>1.93, m |               | 32.3                                           | 1.68, m<br>2.01, m  |
| 16       | 26.9                 | 2.09, m<br>2.20, m |               | 26.8                                           | 1.85, m<br>2.01, m  |
| 17       | 50.5                 | 2.75, m            | 16            | 50.4                                           | 2.75, dd (9.6, 5.2) |
| 18       | 15.8                 | 0.96, s            | 12, 13, 14,   | 15.7                                           | 0.86, s             |

|                     |       |                     |            |       |                     |
|---------------------|-------|---------------------|------------|-------|---------------------|
| 19                  | 176.5 |                     |            | 176.6 |                     |
| 20                  | 174.9 |                     |            | 174.7 |                     |
| 21                  | 73.7  | 4.81, d (18.0)      |            | 73.6  | 4.79, dd (18.2,1.6) |
|                     |       | 4.98, d (18.0)      |            |       | 4.95, dd (18.2,1.6) |
| 22                  | 117.8 | 5.88, s             | 17, 21, 23 | 117.6 | 5.88, s             |
| 23                  | 174.8 |                     |            | 174.6 |                     |
| 1'                  | 100.0 | 4.37, d (7.6)       | 3          |       |                     |
| 2'                  | 83.7  | 3.02, dd (8.4, 8.0) | 1', 2'     |       |                     |
| 3'                  | 86.4  | 3.12, dd (8.8, 8.8) | 2', 4'     |       |                     |
| 4'                  | 74.8  | 3.18, dd (8.4, 8.0) | 3', 5', 6' |       |                     |
| 5'                  | 72.0  | 3.33, m             |            |       |                     |
| 6'                  | 17.8  | 1.29, d (5.6)       | 4', 5'     |       |                     |
| 2'-OCH <sub>3</sub> | 61.1  | 3.63, s             | 2'         |       |                     |
| 3'-OCH <sub>3</sub> | 60.9  | 3.57, s             | 3'         |       |                     |

<sup>a</sup> <sup>1</sup>H (400 MHz) and <sup>13</sup>C (100 MHz) NMR spectroscopic data in chloroform-*d*.

<sup>b</sup> <sup>1</sup>H (400 MHz) and <sup>13</sup>C (150 MHz) NMR spectroscopic data in chloroform-*d*.

Reference:

- 1 S. Kubo, M. Kuroda, Y. Matsuo, D. Masatani, H. Sakagami and Y. Mimakia, *Chemical & Pharmaceutical Bulletin*, 2012, **60**, 1275–1282.
- 2 G. M. Cabrera, M. E. Deluca, A. M. Seldes, E. G. Gros, J. C. Oberti, J. Crockett and M. L. Gross, *Phytochemistry*, 1993, **32**, 1253–1259.
- 3 Y. Rifai, M. A. Arai, T. Koyano, T. Kowithayakorn and M. Ishibashi, *J Nat Med*, 2011, **65**, 629–632.
- 4 H. S. Chang, M. Y. Chiang, H. Y. Hsu, C. W. Yang, C. H. Lin, S. J. Lee and I. S. Chen, *Phytochemistry*, 2013, **87**, 86–95.
